## Latest updates on *MET* targeted therapy for EXON 14 mutations in lung cancer

Mira Al Jaber, Wolfgang Clough and Samir Dalia

Several alterations in the *MET* gene were identified as targetable oncogenic changes leading to non-small cell lung cancer (NSCLC). These include genomic amplifications, exon 14 skipping mutations and fusion [1, 2]. Capmatinib has been considered as a first-line treatment for patients with NSCLC carrying a *MET* exon 14 skipping mutation since May 2020 by the USFDA [3]. A study newly published in early 2023 showed that Crizotinib; a tyrosine kinase inhibitor was also effective for *MET* fusions, which occur rarely in 0.2–0.3% of patients with lung cancer [1].

A major challenge arising after the introduction of tyrosine kinase inhibitors is limited clinical benefit, which is due to primary and potential secondary acquired drug resistance [4, 5]. Several structurally different *MET* tyrosine kinase inhibitors (TKIs) have been developed or are under clinical evaluation. TKIs are categorized into type I TKIs (type Ia: crizotinib; type Ib: savolitinib, capmatinib) and type II TKIs (cabozantinib, glesatinib, merestinib). Combination therapy reduces resistance and enhances clinical outcomes [5]. A clinical study showed that combinations of type I/II TKI inhibitors (capmatinib and merestinib) yielded no resistant clones *in vitro* and led to a significant reduction in tumor outgrowth *in vivo* compared to either *MET* inhibitor alone [5]. In addition, one study showed that in general, type Ib inhibitors were more unlikely to develop resistance than type II inhibitors [6]. Furthermore, the efficacy of resistance suppression was inversely correlated with drug concentration, where greater secondary mutations emerged at lower drug concentrations [5, 6]. This highlights the importance that patients should be on FDA approved drug dosing (e.g., Capmatinib 400 mg orally twice daily) as it is unclear if lower doses have efficacy currently [3].

Based on ongoing Phase I CHRYSALIS, Amivantamab; fully human bispecific antibody targets both *EGFR* and *MET*. It has shown promising results against NSCLC patients with *EGFR* 20 insertion and NSCLC patients with *MET* exon 14 skipping mutations. The drug is given as 1050 mg (pts <80 kg) or 1400 mg (pts ≥80 kg) once weekly in cycle 1 and twice a week until disease progression. This study included 43 pts with *MET* exon 14 skipping mutations. Overall response rate was 33%. The study is still ongoing and results are promising [7].

Other Phase I/II study conducted in China, assesses the use of APL-101 a novel, potent, selective c-MET inhibitor, in patients with NSCLC and advanced

malignancies with c-Met dysregulation. Study is still ongoing and results are not yet available [8].

These clinical trials along with others will show us if other *MET* inhibitors or combination therapy may be better than the current standard of care. The future looks bright for patients with *MET* mutations and NSCLC.

### CONFLICTS OF INTEREST

Authors have no conflicts of interest to declare.

**Samir Dalia:** Department of Medical Oncology, Mercy Hospital, Joplin, MO 64804, USA

**Correspondence to:** Samir Dalia,  
**email:** samir.dalia@mercy.net

**Keywords:** non small cell lung cancer; *MET* mutation; targeted therapy; precision medicine

**Received:** March 02, 2023

**Published:** May 26, 2023

### REFERENCES

1. Sun D, et al. *J Transl Med.* 2023; 21:150. <https://doi.org/10.1186/s12967-023-03999-7>. [PubMed]
2. Fernandes M, et al. *Mol Oncol.* 2023. <https://doi.org/10.1002/1878-0261.13397>. [PubMed]
3. <https://www.fda.gov/drugs/resources-information-approved-drugs/fda-disco-burst-edition-fda-approvals-tabrecta-capmatinib-metastatic-non-small-cell-lung-cancer-and>.
4. Yao Y, et al. *Respir Res.* 2023; 24:28. <https://doi.org/10.1186/s12931-023-02329-1>. [PubMed]
5. Bahcall M, et al. *Mol Cancer Ther.* 2022; 21:322–35. <https://doi.org/10.1158/1535-7163.MCT-21-0344>. [PubMed]
6. Fujino T, et al. *J Thorac Oncol.* 2019; 14:1753–65. <https://doi.org/10.1016/j.jtho.2019.06.023>. [PubMed]
7. Krebs MG, et al. *J Clin Oncol.* 2022; 40:9008. [http://dx.doi.org/10.1200/JCO.2022.40.16\\_suppl.9008](http://dx.doi.org/10.1200/JCO.2022.40.16_suppl.9008).
8. <https://clinicaltrials.gov/ct2/show/results/NCT03175224?term=Met+14+exon&cond=Non+Small+Cell+Lung+Cancer&draw=5&rank=17>.

**Copyright:** © 2023 Al Jaber et al. This is an open access article distributed under the terms of the [Creative Commons Attribution License](https://creativecommons.org/licenses/by/3.0/) (CC BY 3.0), which permits unrestricted use, distribution, and reproduction in any medium, provided the original author and source are credited.
